# Supplementary material for: Modeling the Mechanism of Action of a DGAT1 Inhibitor Using a Causal Reasoning Platform
Source: PLoS One. 2011 Nov 4;6(11):e27009. doi: 10.1371/journal.pone.0027009 (PMC3208573; doi:10.1371/journal.pone.0027009)
Supplement: Table S1 — Fold changes as measurement by Affymetrix microarray and by TaqMan QPCR (NA = data not available). (XLS) [file pone.0027009.s001.xls]

## Sheet: Sheet1
Supplemental Table 1. Fold changes as measurement by Affymetrix microarray and by TaqMan QPCR (NA: data not available).
Gene	15 mpk D1 vs. Veh D1				3 mpk D1 vs. Veh D1
	Microarray		QPCR		Microarray		QPCR
	Fold	P-value	Fold	P-value	Fold	P-value	Fold	P-value
Abcg8	-2.68	0.0036	-2.69	0	-2.06	0.0711	-2.19	0.0005
Acaa1	-2.5	0.0019	-1.56	0.0034	-2.07	0.0344	-1.53	0.0051
Acaca	-1.15	0.2441	1.03	0.8708	-1.02	0.9005	1.09	0.5864
Acacb	-1.1	0.6229	-1.2	0.3852	-1.09	0.5758	-1.14	0.5229
Ace	-2.46	0.0101	-2.57	0.0001	-1.92	0.1124	-2.36	0.0003
Acot12	-2.97	0.0034	-2.6	0.0004	-2.07	0.0981	-2.2	0.0032
Acot2	NA	NA	-2.01	0.0006	NA	NA	-2.06	0.0004
Acot3	NA	NA	-3.14	0	NA	NA	-2.6	0.0004
Acot4	NA	NA	-3.53	0.0004	NA	NA	-2.57	0.007
Acox1	-1.83	0.0049	-2.2	0.0001	-1.44	0.1575	-1.6	0.0139
Acsf2	-3.78	0.0006104	-3.97	0	-2.58	0.0322	-3.01	0.0001
Acsl1	-1.56	0.0011	-1.57	0.0048	-1.26	0.1546	-1.21	0.2349
Acsl3	-2.25	0.0013	-2.41	0	-1.83	0.0387	-2.55	0
Acss2	-2.06	0.001	-1.92	0.0004	-1.27	0.3779	-1.6	0.0096
Adfp	-1.72	0.0006	-2.28	0.0003	-1.47	0.0307	-2.43	0.0001
Agpat1	-1.65	0.0031	-1.56	0.0102	-1.43	0.075	-1.51	0.0169
Agpat6	1.27	0.0535	1.23	0.2304	1.22	0.1492	1.2	0.3052
Aldh1a1	-1.49	0.0912	-1.44	0.0895	-1.32	0.2909	-1.47	0.072
Aldh1b1	-1.56	0.0238	-1.34	0.1653	-1.32	0.2381	-1.34	0.18
Anxa2	1.74	0.0001	2.11	0.0061	1.61	0.003	1.78	0.0329
Apoa1	-1.51	0.001	-2.77	0	-1.26	0.1091	-2.57	0
Apoa4	-1.64	0.001	-3.61	0	-1.33	0.1114	-3.05	0
Apob	-1.81	0.0013	-2.93	0.0003	-1.42	0.1105	-2.58	0.0019
Apoc3	-3.86	0.0003	-5.54	0	-2.32	0.0454	-3.63	0.0001
Aqp7	-2.96	0.0049	-2.41	0	-2.04	0.1199	-2.04	0.0004
Cast	1.59	0.0007	1.48	0.0334	1.35	0.0534	1.35	0.1074
Ccl24	-1.64	0.0056	-1.78	0.0002	-1.42	0.0961	-1.62	0.0017
Chka	-1.79	0.0039	-2.04	0	-1.52	0.0769	-2	0.0001
Cpt1a	-1.09	0.8321	-1.21	0.3035	-1.12	0.6767	-1.2	0.3103
Ctsl	2.3	0.0006	2.11	0.0012	2.29	0.0028	1.84	0.0056
Cubn	-4.42	0.0037	-3.32	0.0002	-2.4	0.1512	-2.53	0.0037
Cyp4b1	-3.76	0.0006	-3.56	0	-2.44	0.042	-3.25	0
Dci	-2.13	0.0066	-1.78	0.0012	-1.67	0.1211	-1.6	0.0075
Decr2	-1.63	0.0047	-1.58	0.0072	-1.37	0.1248	-1.61	0.0036
Dgat1	-1.41	0.027	-1.49	0.0193	-1.26	0.2005	-1.58	0.0081
Dgat2	-1.67	0.0049	-1.93	0.0004	-1.42	0.1057	-1.8	0.0014
Ech1	-1.51	0.0154	-1.45	0.0334	-1.32	0.168	-1.27	0.154
Edn2	1.66	0.0014	1.31	0.2144	1.69	0.0047	1.46	0.0892
Egr1	2.07	0.028	2.16	0.0029	1.56	0.2597	1.55	0.0883
Ehhadh	-2.48	0.0054	-2.2	0.001	-2.03	0.0635	-1.92	0.0061
Elovl5	1.11	0.5632	1	0.9993	1.03	0.8615	1.21	0.3346
Elovl6	-1.17	0.1462	-1.13	0.3754	-1.17	0.1641	-1.22	0.1411
Etnk1	-1.29	0.0015	-1.73	0.0013	-1.28	0.0079	-1.69	0.0021
Fabp5	1.43	0.0741	1.43	0.0532	1.2	0.4421	1.39	0.0729
Fads2	-1.23	0.1836	-1.42	0.0624	-1.31	0.0771	-1.38	0.0876
Fdft1	1.15	0.5509	1.13	0.4433	1.46	0.0308	1.29	0.0852
G6pdx	-1.07	0.6158	-1.04	0.8063	-1.01	0.9581	-1.04	0.7798
Gast	-1.16	0.6809	-1.12	0.7439	-1.06	0.8647	-1.15	0.6694
Gcg	-1.1	0.6614	1.06	0.702	1.07	0.7174	-1.03	0.8639
Ggt1	-3.46	0.0007	-3.32	0	-2.74	0.016	-3.01	0.0002
Gpd1	-1.66	0.107	-2.11	0.0002	-1.5	0.2397	-1.82	0.0024
Gpx2	2.51	0	3.05	0	2.08	0.0002	2.1	0.0029
Hk2	2.12	0.0016	1.59	0.0357	1.28	0.417	1.31	0.2187
Hmgcr	1.35	0.022	1.17	0.3086	1.49	0.0079	1.37	0.0438
Hmgcs1	1.3	0.1237	1.16	0.2939	1.58	0.0088	1.34	0.0488
Hsd11b1	-1.3	0.1141	-1.46	0.0292	-1.37	0.0727	-1.46	0.0287
Idi1	1.2	0.5159	1.16	0.3895	1.45	0.0839	1.17	0.3604
Il33	NA	NA	2.58	0.0035	NA	NA	2.6	0.0033
Insig1	-2.62	0	-3.43	0	-2.13	0.0002	-2.81	0
Lipa	-2.12	0	-2.17	0.0003	-1.89	0.0004	-2.27	0.0001
Lpin2	-1.49	0.0261	-1.66	0.0071	-1.4	0.0989	-1.52	0.0259
Lpl	1.81	0.3829	1.27	0.5153	2.01	0.2625	1.74	0.1345
Ly6c	2	0.09	1.39	0.2992	2.28	0.0611	1.39	0.3024
Lypla3	-1.58	0.0016	-2.16	0	-1.33	0.1026	-1.74	0.001
Me1	-2.67	0.0016	-2.17	0.0001	-2.07	0.0453	-2.08	0.0001
Me2	1.24	0.4265	1.33	0.1115	1.17	0.5486	1.32	0.1174
Mgll	-1.48	0.0371	-1.46	0.0701	-1.44	0.0881	-1.27	0.245
Nqo1	1.42	0.0529	1.54	0.0182	1.3	0.2079	1.32	0.122
Nr1h3	-1.53	0.0004	-1.49	0.0053	-1.24	0.1296	-1.27	0.0903
Nrg1	2.15	0.0212	2.22	0.0049	2.07	0.0565	2.43	0.0018
Oit1	4.36	0	3.66	0	3.35	0	2.68	0.0002
Pck1	-6.33	0.0009	-5.46	0	-2.2	0.2426	-3.48	0.0021
Pcyt1a	-1.26	0.2228	-1.62	0.0022	-1.33	0.1234	-1.39	0.037
Pklr	-1.57	0.0577	-1.49	0.0057	-1.34	0.2914	-1.39	0.0254
Pnliprp2	1.38	0.5374	1.93	0.033	1.94	0.0991	2.06	0.02
Pnpla3	NA	NA	-5.46	0	NA	NA	-2.53	0.0011
Ppap2c	1.48	0.0002	1.38	0.0681	1.3	0.0244	1.18	0.3278
Ppp2ca	-1.31	0.001	-1.69	0.0035	-1.33	0.0024	-1.53	0.0185
Ptdss2	-1.18	0.0937	-1.21	0.2565	-1.22	0.0649	-1.13	0.4968
Reg3b	16.02	0	32.22	0	11.09	0.0002	13.93	0
Scarb1	-3.19	0.002	-3.32	0	-2.66	0.0254	-2.25	0.004
Scd1	-3.15	0.0218	-4.79	0.0001	-1.49	0.5285	-1.88	0.1097
Serpine1	1.2	0.2591	1.51	0.0574	-1.06	0.7359	1.21	0.3774
Serpine2	1.12	0.7339	1.06	0.7297	1.16	0.5353	1.21	0.2947
Slc27a2	-2.42	0.2986	-2.1	0.2651	-2.31	0.3121	-4.41	0.0272
Spink4	6.76	0	9.45	0	5.43	0	6.19	0
Sqle	1.22	0.3964	1.31	0.1659	1.56	0.0281	1.49	0.0431
Srebf1	-2.39	0.0023	-2.93	0	-1.94	0.0454	-2.43	0.0003
Tbc1d1	-1.33	0.0059	-1.53	0.0125	-1.29	0.0344	-1.31	0.1108
Timp1	3.84	0.0002	5.43	0	3.44	0.0024	3.71	0
Tnf	1.04	0.8479	-1.04	0.896	1.02	0.8664	1.23	0.5341
